# Supplementary material
Source: PubMed Central journal article supplement (PMC8062089)
Supplement: NIHMS1686951-supplement-Supp_Material_Losartan_HIV.pdf [file NIHMS1686951-supplement-Supp_Material_Losartan_HIV.pdf]

**SUPPLEMENTAL TABLE A: Baseline Levels of Laboratory Measures**

|                                                                         | N   | Losartan<br>Median [IQR] | Placebo<br>Median [IQR] |
|-------------------------------------------------------------------------|-----|--------------------------|-------------------------|
| <i>Clinical Laboratory Measures</i>                                     |     |                          |                         |
| CD4+ count, cells/ $\mu$ L                                              | 108 | 451 [300, 496]           | 430 [321, 516]          |
| CD8+ count, cells/ $\mu$ L                                              | 108 | 698 [491, 879]           | 683 [450, 948]          |
| Creatinine, mg/dL                                                       | 108 | 1.0 [0.9, 1.2]           | 1.1 [0.9, 1.2]          |
| Potassium, mmol/L                                                       | 108 | 4.2 [4.0, 4.4]           | 4.3 [4.0, 4.4]          |
| AST/SGOT, U/L                                                           | 108 | 27 [22, 33]              | 28 [22, 35]             |
| ALT/SGPT, U/L                                                           | 108 | 26 [19, 35]              | 28 [19, 40]             |
| Platelets, $10^9$ /L                                                    | 108 | 205 [176, 230]           | 192 [170, 236]          |
| Hemoglobin, g/dL                                                        | 108 | 14.1 [13.4, 15.0]        | 14.8 [13.6, 15.6]       |
| White blood count, $10^9$ cells/L                                       | 108 | 5.0 [4.2, 5.8]           | 5.1 [4.2, 6.0]          |
| <i>Soluble Proteins</i>                                                 |     |                          |                         |
| IL-6, pg/mL                                                             | 108 | 0.91 [0.67, 1.30]        | 1.04 [0.75, 1.41]       |
| TNF-R1, pg/mL                                                           | 108 | 1193 [1049, 1378]        | 1161 [1027, 1357]       |
| sCD163, ng/mL                                                           | 108 | 824 [578, 990]           | 711 [537, 890]          |
| sCD14, ng/mL                                                            | 108 | 1383 [1247, 1616]        | 1330 [1163, 1613]       |
| Neopterin, pg/mL                                                        | 108 | 9.48 [7.03, 12.49]       | 8.94 [7.25, 12.20]      |
| D-Dimer, $\mu$ g/mL FEU                                                 | 108 | 0.26 [0.13, 0.47]        | 0.23 [0.15, 0.31]       |
| Hyaluronic acid, ng/mL                                                  | 108 | 41.5 [27.7, 69.4]        | 39.8 [26.0, 75.3]       |
| Beta-crosslaps, ng/mL                                                   | 108 | 0.37 [0.28, 0.60]        | 0.40 [0.27, 0.54]       |
| Galectin-3, ng/mML                                                      | 108 | 8.69 [6.55, 10.08]       | 7.83 [7.07, 9.87]       |
| NTproBNP, pg/mML                                                        | 108 | 39.2 [17.1, 69.2]        | 27.1 [16.5, 77.5]       |
| ST2, ng/mL                                                              | 108 | 23.4 [17.6, 28.1]        | 23.2 [17.9, 27.7]       |
| <i>Cellular Phenotypes</i>                                              |     |                          |                         |
| CD14 <sup>+</sup> CD16 <sup>-</sup> Monocytes, %                        | 33  | 85.8 [83.5, 88.0]        | 80.3 [33.3, 84.2]       |
| CD14 <sup>+</sup> CD16 <sup>+</sup> Monocytes, %                        | 33  | 2.2 [1.5, 3.8]           | 1.5 [0.0, 2.5]          |
| CD14 <sup>dim</sup> CD16 <sup>+</sup> Monocytes, %                      | 33  | 2.9 [2.3, 3.8]           | 2.3 [0.0, 6.3]          |
| CX3CR1 <sup>+</sup> Monocytes, %                                        | 33  | 6.4 [5.9, 10.5]          | 4.9 [1.9, 12.5]         |
| CCR2 <sup>+</sup> Monocytes, %                                          | 33  | 88.9 [81.7, 90.3]        | 82.8 [75.2, 89.4]       |
| CD4 <sup>+</sup> CD27 <sup>-</sup> CD45RO <sup>+</sup> EM T-cells, %    | 33  | 15.8 [10.2, 22.5]        | 24.4 [16.4, 38.8]       |
| CD8 <sup>+</sup> CD27 <sup>-</sup> CD45RO <sup>+</sup> EM T-cells, %    | 33  | 20.9 [17.8, 27.6]        | 21.9 [13.9, 38.8]       |
| CD4 <sup>+</sup> CD27 <sup>+</sup> CD45RO <sup>+</sup> CM T-cells, %    | 33  | 35.9 [28.0, 45.6]        | 44.7 [16.7, 48.2]       |
| CD8 <sup>+</sup> CD27 <sup>+</sup> CD45RO <sup>+</sup> CM T-cells, %    | 33  | 20.9 [11.6, 31.6]        | 17.5 [8.3, 27.3]        |
| CD4 <sup>+</sup> CD27 <sup>+</sup> CD45RO <sup>-</sup> naïve T-cells, % | 33  | 42.2 [26.8, 50.5]        | 15.3 [13.0, 3.9.0]      |
| CD8 <sup>+</sup> CD27 <sup>+</sup> CD45RO <sup>-</sup> naïve T-cells, % | 33  | 21.6 [12.0, 27.5]        | 17.3 [6.8, 25.4]        |

*ALT=alanine aminotransferase; AST=aspartate aminotransferase; IL-6=interleukin-6; TNF-R1=tumor necrosis factor receptor 1; NTproBNP=N-terminal pro b-type natriuretic peptide; EM=effector memory; CM=central memory*

373 **SUPPLEMENTAL FIGURE A: Treatment Effect of Losartan on Monocyte Phenotypes**  
 374 **(n=33)**

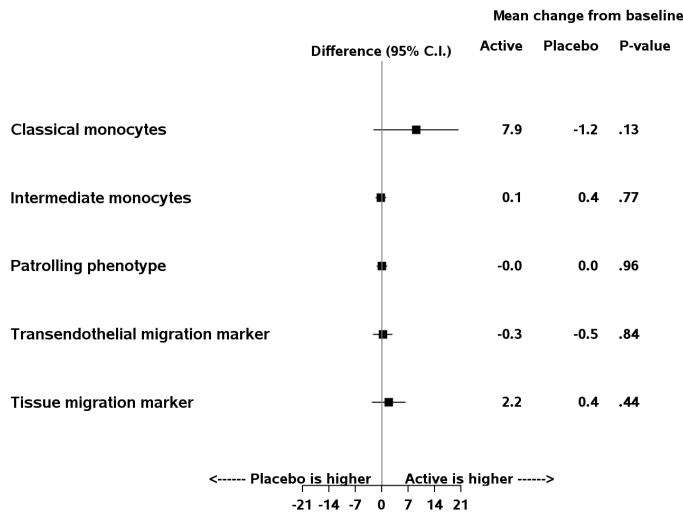

375

376 **SUPPLEMENTAL FIGURE B: Treatment Effect of Losartan on T-cell Memory Subsets**  
 377 **(n=33)**

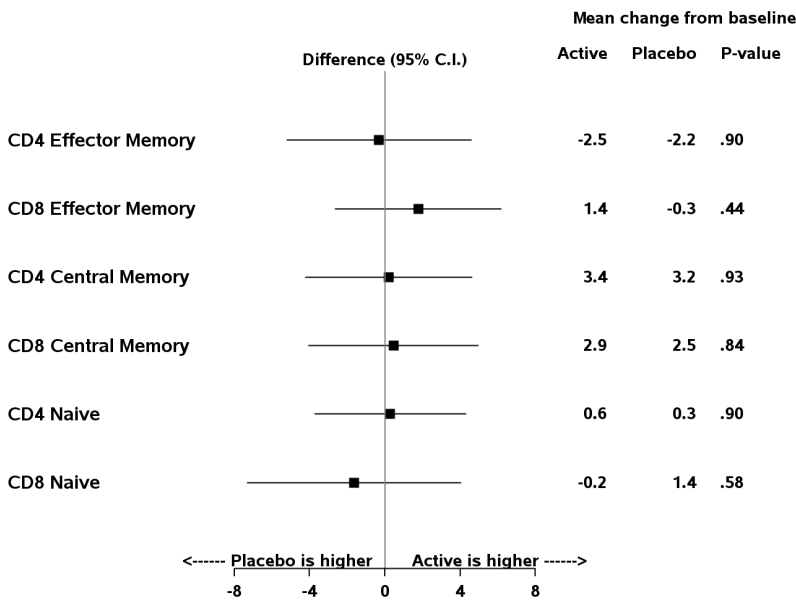

378

379 *Legend:* Forrest plots include point estimates reflecting the treatment effect over follow-up of  
 380 losartan versus placebo, with error bars reflecting 95% confidence intervals. Treatment effect is  
 381 reflected as the mean difference, with each cell subset measured as a percent of the total  
 382 monocyte or T-cell population, respectively. The mean change from baseline over follow-up  
 383 within active-losartan and placebo groups is shown to the right of the graphs for each of the  
 384 corresponding measures.

385 **SUPPLEMENTAL FIGURE C: Subjective Adherence**

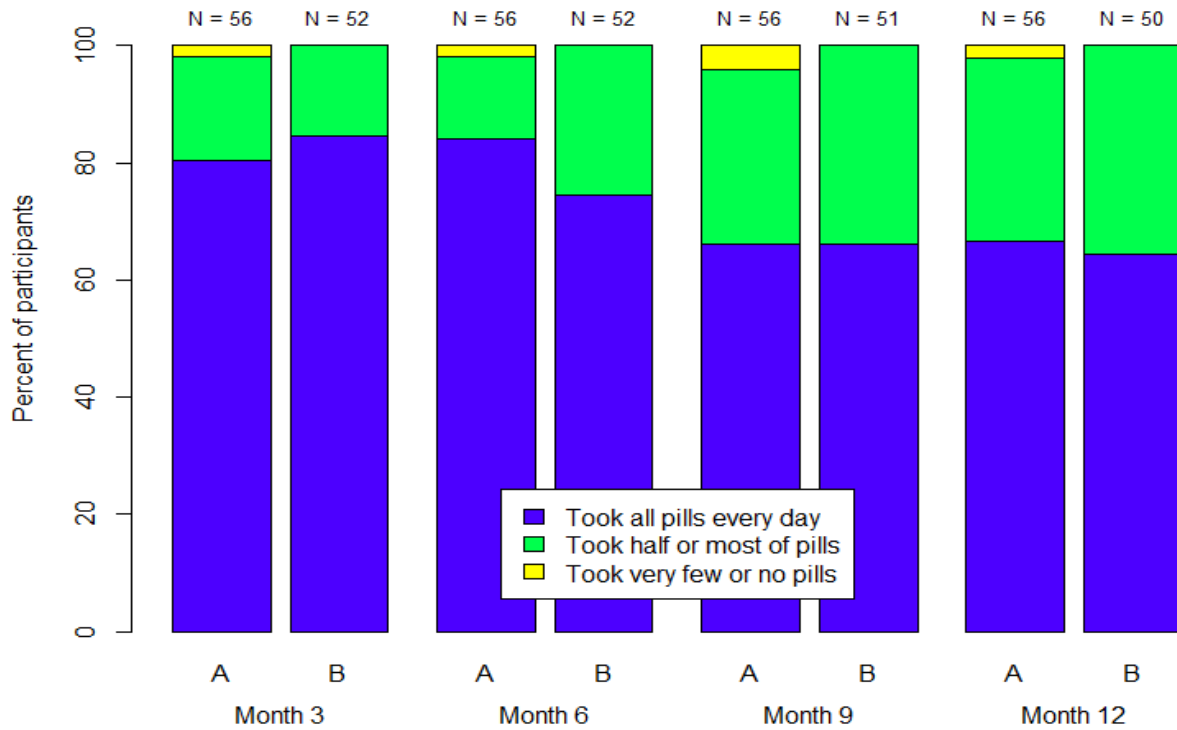

386

387 **LEGEND:** Self-reported adherence is presented at 3-month intervals for participants  
388 randomized to losartan ('A') and placebo ('B'). Each bar reflects the self-reported adherence  
389 over the prior 3-month follow-up period; i.e., Month 3 reflects adherence from randomization  
390 until the month 3 visit. Adherence was collapsed into three groups as 100%, ≥50% but with  
391 some misuses, and any response reflecting <50% of days adherent.

392
